# Supplementary material for: Por Secretion System-Dependent Secretion and Glycosylation of Porphyromonas gingivalis Hemin-Binding Protein 35
Source: PLoS One. 2011 Jun 22;6(6):e21372. doi: 10.1371/journal.pone.0021372 (PMC3120885; doi:10.1371/journal.pone.0021372)
Supplement: Table S1 — Identification of peptides from the diffuse HBP35 protein and the 40-kDa HBP35 protein by LCMS. (XLS) [file pone.0021372.s001.xls]

## Sheet: Sheet1
Table S1. Identification of peptide fragments of HBP35.
Sample	Molecular mass	Peptide fragments found by LCMS	PMF Mascot score
Band 1	90 kDa	V73-K86, G137-K150, V169-K186	77
Band 2	80 kDa	V73-K86, G137-K150, V169-K186	77
Band 3	78 kDa	V73-K86, G137-K150	58
Band 4	76 kDa	A61-R72, V73-K86, G137-K150, V169-K186	118
Band 5	74 kDa	A61-R72, V73-K86, K118-K131, G137-K150, V169-K186	207
Band 6	72 kDa	A61-R72, V73-K86, K118-K131, G119-K131, G137-K150, V169-K186, G218-K232, L237-K243	276
Band 7	72 kDa	A61-R72, V73-K86, K118-K131, G137-K150, V169-K186	154
Band 8	70 kDa	A61-R72, V73-K86, K118-K131, G137-K150	127
Band 9	65 kDa	A61-R72, V73-K86, K118-K131, G137-K150	126
Band 10	60 kDa	V73-K86, K118-K131, G119-K131, G137-K150, G218-K232, L237-K243	268
Band 11	60 kDa	K118-K131, G137-K150, V169-K186	74
Band 12	40 kDa	A61-R72, V73-K86, K118-K131, G119-K131, G137-K150, V169-K176, G218-K232, L237-K243, A274-K289, I297-K305, M306-K317, N318-R329	354
Band 13	40 kDa	A61-R72, V73-K86, K118-K131, G137-K150, G218-K232, L237-K243, A274-K289, I297-K305, M306-K317, N318-R329, I330-340K	666
