# Supplementary material for: Por Secretion System-Dependent Secretion and Glycosylation of Porphyromonas gingivalis Hemin-Binding Protein 35
Source: PLoS One. 2011 Jun 22;6(6):e21372. doi: 10.1371/journal.pone.0021372 (PMC3120885; doi:10.1371/journal.pone.0021372)
Supplement: Table S3 — Plasmids used in this study [40]. (XLS) [file pone.0021372.s003.xls]

## Sheet: Sheet1
Table S3. Plasmids used in this study.
Plasmid	Description	Forward primer	Reverse primer	Source or reference
For E. coli
pBluescript II SK(-)	Apr, cloning vector			Stratagene
pCR4	Apr Kmr, cloning vector			Invitrogen
pGEM-T easy	Apr, cloning vector			Promega
pGFPuv	Apr, GFPuv expression vector			Clontech
pKD375	Apr Tcr, contains the tetQ DNA block			37
pKD755	Apr, complementation vector for hbp35 gene with the cepA DNA block			10
pKD768	Apr Kmr, pCR4-Pro-HBP35signal	HBPsignalFw	HBPsignalBw	This study
pKD769	Apr Kmr, pCR4-GFP	GFPuvFw	GFPuvBw	This study
pKD770	Apr Kmr, pCR4-CTD[HBP35(N260-P344)]-Ter	HBP260Fw	HBPTerBw	This study
pKD771	Apr Kmr, pCR4-CTD[HBP35(N265-P344)]-Ter	HBP265Fw	HBPTerBw	This study
pKD772	Apr Kmr, pCR4-CTD[HBP35(P286-P344)]-Ter	HBP286Fw	HBPTerBw	This study
pKD773	Apr Kmr, pCR4-CTD[HBP35(Y303-P344)]-Ter	HBP303Fw	HBPTerBw	This study
pKD774	Apr Kmr, pCR4-CTD[HBP35(G313-P344)]-Ter	HBP313Fw	HBPTerBw	This study
pKD775	Apr Kmr, pCR4-CTD[HBP35(N318-P344)]-Ter	HBP318Fw	HBPTerBw	This study
pKD776	Apr Kmr, pCR4-CTD[HBP35(P323-P344)]-Ter	HBP323Fw	HBPTerBw	This study
pKD777	Apr Kmr, pCR4-CTD[HBP35(V327-P344)]-Ter	HBP327Fw	HBPTerBw	This study
pKD778	Apr Kmr, pCR4-CTD[HBP35(R329-P344)]-Ter	HBP329Fw	HBPTerBw	This study
pKD779	Apr Kmr, pCR4-CTD[HBP35(G334-P344)]-Ter	HBP334Fw	HBPTerBw	This study
pKD780	Apr Kmr, pCR4-CTD[HBP35(K340-P344)]-Ter	HBP340Fw	HBPTerBw	This study
pKD781	Apr Kmr, pCR4-HBP35Stop-Ter	HBPStopFw	HBPTerBw	This study
pKD782	Apr, pBSSK-Pro-HBP35signal			This study
pKD783	Apr, pBSSK-Pro-HBP35signal-GFP			This study
pKD784	Apr, pBSSK-Pro-HBP35signal-GFP-CTD[HBP35(N260-P344)]-Ter			This study
pKD785	Apr, pBSSK-Pro-HBP35signal-GFP-CTD[HBP35(N265-P344)]-Ter			This study
pKD786	Apr, pBSSK-Pro-HBP35signal-GFP-CTD[HBP35(P286-P344)]-Ter			This study
pKD787	Apr, pBSSK-Pro-HBP35signal-GFP-CTD[HBP35(Y303-P344)]-Ter			This study
pKD788	Apr, pBSSK-Pro-HBP35signal-GFP-CTD[HBP35(G313-P344)]-Ter			This study
pKD789	Apr, pBSSK-Pro-HBP35signal-GFP-CTD[HBP35(N318-P344)]-Ter			This study
pKD790	Apr, pBSSK-Pro-HBP35signal-GFP-CTD[HBP35(P323-P344)]-Ter			This study
pKD791	Apr, pBSSK-Pro-HBP35signal-GFP-CTD[HBP35(V327-P344)]-Ter			This study
pKD792	Apr, pBSSK-Pro-HBP35signal-GFP-CTD[HBP35(R329-P344)]-Ter			This study
pKD793	Apr, pBSSK-Pro-HBP35signal-GFP-CTD[HBP35(G334-P344)]-Ter			This study
pKD794	Apr, pBSSK-Pro-HBP35signal-GFP-CTD[HBP35(K340-P344)]-Ter			This study
pKD795	Apr, pBSSK-Pro-HBP35signal-GFP-HBP35Stop-Ter			This study
pKD796	Apr Kmr, pCR4-CTD[CPG70]-Ter	CPGFw	CPGBw	This study
pKD797	Apr Kmr, pCR4-CTD[PAD]-Ter	PADFw	PADBw	This study
pKD798	Apr Kmr, pCR4-CTD[P27]-Ter	P27Fw	P27Bw	This study
pKD799	Apr Kmr, pCR4-CTD[RgpB]-Ter	RgpBFw	RgpBBw	This study
pKD800	Apr Kmr, pCR4-CTD[HBP35(K340A)]-Ter	K340AFw	K340ABw	This study
pKD806	Apr Kmr, pCR4-CTD[CPG70(K817A)]-Ter	K817AFw	K817ABw	This study
pKD807	Apr Kmr, pCR4-CTD[PAD(K553A)]-Ter	K553AFw	K553ABw	This study
pKD809	Apr, pBSSK-Pro-HBP35signal-GFP-CTD[CPG70]-Ter			This study
pKD810	Apr, pBSSK-Pro-HBP35signal-GFP-CTD[PAD]-Ter			This study
pKD811	Apr, pBSSK-Pro-HBP35signal-GFP-CTD[P27]-Ter			This study
pKD812	Apr, pBSSK-Pro-HBP35signal-GFP-CTD[RgpB]-Ter			This study
pKD813	Apr, pBSSK-Pro-HBP35signal-GFP-CTD[HBP35(K340A)]-Ter			This study
PKD814	Apr, pBSSK-Pro-HBP35signal-GFP-CTD[CPG70(K817A)]-Ter			This study
PKD815	Apr, pBSSK-Pro-HBP35signal-GFP-CTD[PAD(K553A)]-Ter			This study
pKD817	Apr Kmr, pCR4-HBP35	HBPsignalFw	HBPTerBw	This study
pKD818	Apr Kmr, pCR4-HBP35[M1A]	M1AFw	M1ABw	This study
pKD819	Apr Kmr, pCR4-HBP35[M135A]	M135AFw	M135ABw	This study
pKD820	Apr, pBSSK-HBP35[K273A]	K273AFw	K273ABw	This study
pKD821	Apr Kmr, pCR4-HBP35[Y291A]	Y291AFw	Y291ABw	This study
pKD822	Apr Kmr, pCR4-HBP35[G295A]	G295AFw	G295ABw	This study
pKD823	Apr Kmr, pCR4-HBP35[K296A]	K296AFw	K296ABw	This study
pKD824	Apr Kmr, pCR4-HBP35[G324A]	G324AFw	G324ABw	This study
pKD825	Apr Kmr, pCR4-HBP35[Y326A]	Y326AFw	Y326ABw	This study
pKD826	Apr Kmr, pCR4-HBP35[K340A]	K340AFw	K340ABw	This study
pKD833	Apr, 2.3 kb including vimA gene cloned into pUC19			This study
pUC19	Apr, a general cloning vector			Stratagene
For P. gingivalis
pTCB	Apr, Tcr, E. coli-P. gingivalis shuttle plasmid			40
pKD834	Apr, Tcr, tetQ gene cassette was inserted into BglII site whithin vimA gene of pKD833			This study
pKD835	Apr, Tcr, pTCB-Pro-HBP35signal-GFP-CTD[HBP35(N260-P344)]-Ter			This study
pKD836	Apr, Tcr, pTCB-Pro-HBP35signal-GFP-CTD[HBP35(N265-P344)]-Ter			This study
pKD837	Apr, Tcr, pTCB-Pro-HBP35signal-GFP-CTD[HBP35(P286-P344)]-Ter			This study
pKD838	Apr, Tcr, pTCB-Pro-HBP35signal-GFP-CTD[HBP35(Y303-P344)]-Ter			This study
pKD839	Apr, Tcr, pTCB-Pro-HBP35signal-GFP-CTD[HBP35(G313-P344)]-Ter			This study
pKD840	Apr, Tcr, pTCB-Pro-HBP35signal-GFP-CTD[HBP35(N318-P344]-Ter			This study
pKD841	Apr, Tcr, pTCB-Pro-HBP35signal-GFP-CTD[HBP35(P323-P344)]-Ter			This study
pKD842	Apr, Tcr, pTCB-Pro-HBP35signal-GFP-CTD[HBP35(V327-P344)]-Ter			This study
pKD843	Apr, Tcr, pTCB-Pro-HBP35signal-GFP-CTD[HBP35(R329-P344)]-Ter			This study
pKD844	Apr, Tcr, pTCB-Pro-HBP35signal-GFP-CTD[HBP35(G334-P344)]-Ter			This study
pKD845	Apr, Tcr, pTCB-Pro-HBP35signal-GFP-CTD[HBP35(K340-P344)]-Ter			This study
pKD846	Apr, Tcr, pTCB-Pro-HBP35signal-GFP-HBP35Stop-Ter			This study
pKD850	Apr, Tcr, pTCB-HBP35			This study
pKD851	Apr, Tcr, pTCB-HBP35[M1A]			This study
pKD852	Apr, Tcr, pTCB-HBP35[M135A]			This study
pKD853	Apr, Tcr, pTCB-HBP35[Y291A]			This study
pKD854	Apr, Tcr, pTCB-HBP35[G295A]			This study
pKD855	Apr, Tcr, pTCB-HBP35[K296A]			This study
pKD856	Apr, Tcr, pTCB-HBP35[G324A]			This study
pKD857	Apr, Tcr, pTCB-HBP35[Y326A]			This study
pKD858	Apr, Tcr, pTCB-HBP35[K340A]			This study
pKD859	Apr, Tcr, pTCB-Pro-HBP35signal-GFP-CTD[CPG70]-Ter			This study
pKD860	Apr, Tcr, pTCB-Pro-HBP35signal-GFP-CTD[PAD]-Ter			This study
pKD861	Apr, Tcr, pTCB-Pro-HBP35signal-GFP-CTD[P27]-Ter			This study
pKD862	Apr, Tcr, pTCB-Pro-HBP35signal-GFP-CTD[RgpB]-Ter			This study
pKD863	Apr, Tcr, pTCB-Pro-HBP35signal-GFP-CTD[HBP35(K340A)]-Ter			This study
pKD864	Apr, Tcr, pTCB-Pro-HBP35signal-GFP-CTD[CPG70(K817A)]-Ter			This study
pKD865	Apr, Tcr, pTCB-Pro-HBP35signal-GFP-CTD[PAD(K553A)]-Ter			This study
pKD866	Apr, Emr, pBluescript-porVup-ermF-porVdw			This study
pKD867	Apr, Emr, pBluescript-pgn0663up-ermF-pgn0663dw			This study
pKD868	Apr, Emr, pBluescript-wzyup-ermF-wzydw			This study
pKD869	Apr, Emr, pBluescript-waaLup-ermF-waaLdw			This study
